# Supplementary material for: The key role of atmospheric absorption in the Asian Summer Monsoon response to dust emissions in CMIP6 models
Source: Copernicus journal article supplement (doi:10.5194/egusphere-2023-3075), 2024-02-20
Supplement: Supplementary file 1 [file egusphere-2023-3075-supplement.pdf]

*Supplementary of*

**The key role of atmospheric absorption in the Asian Summer  
Monsoon response to dust emissions in CMIP6 Models**

Alcide Zhao et al.

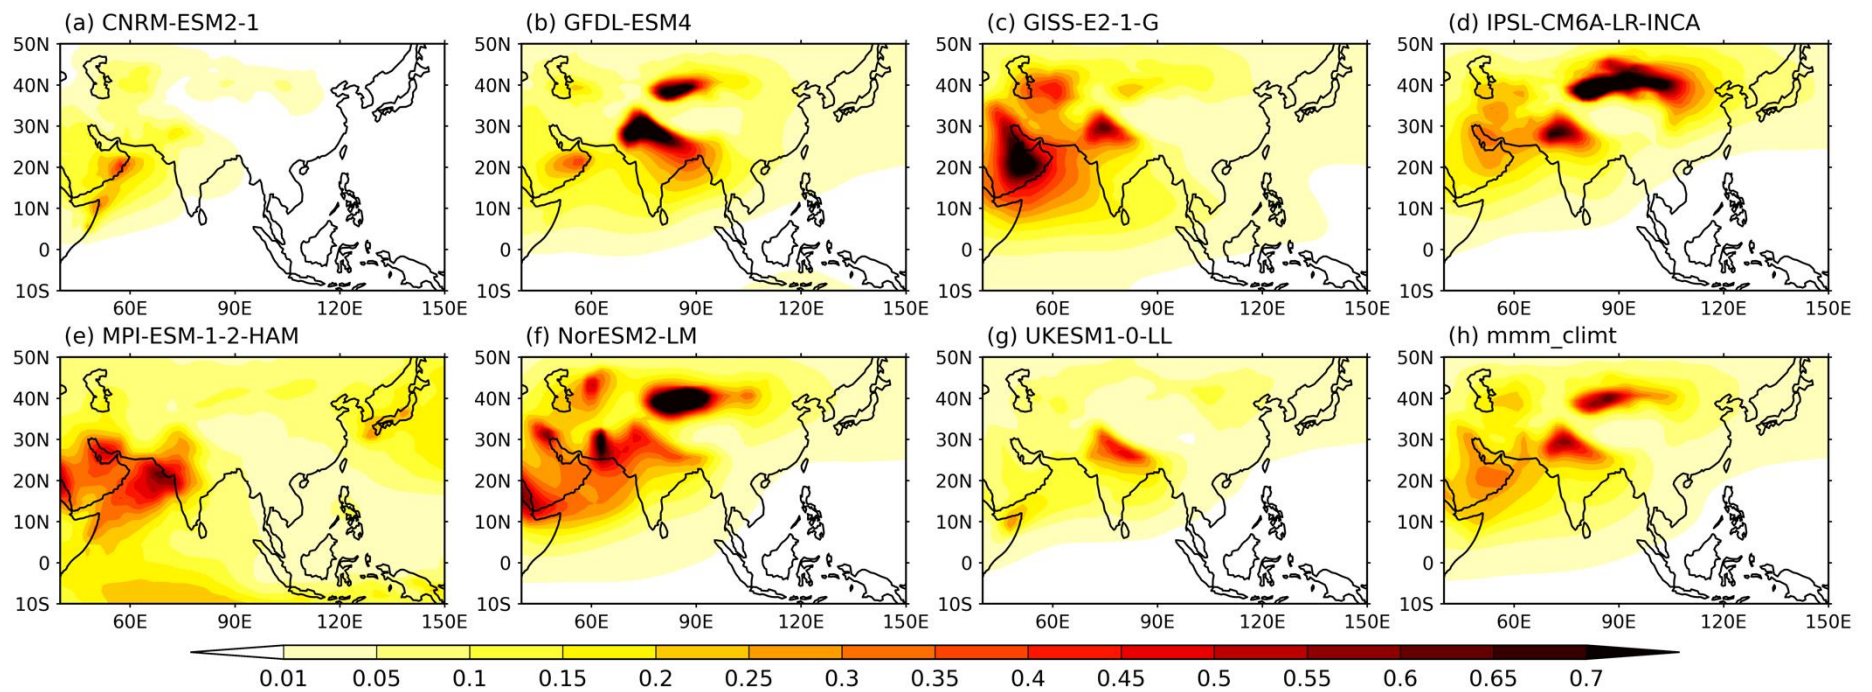

**Figure S1.** Models' simulated JJA climatology of dust aerosol optical depth (DOD) from the piClim-control.

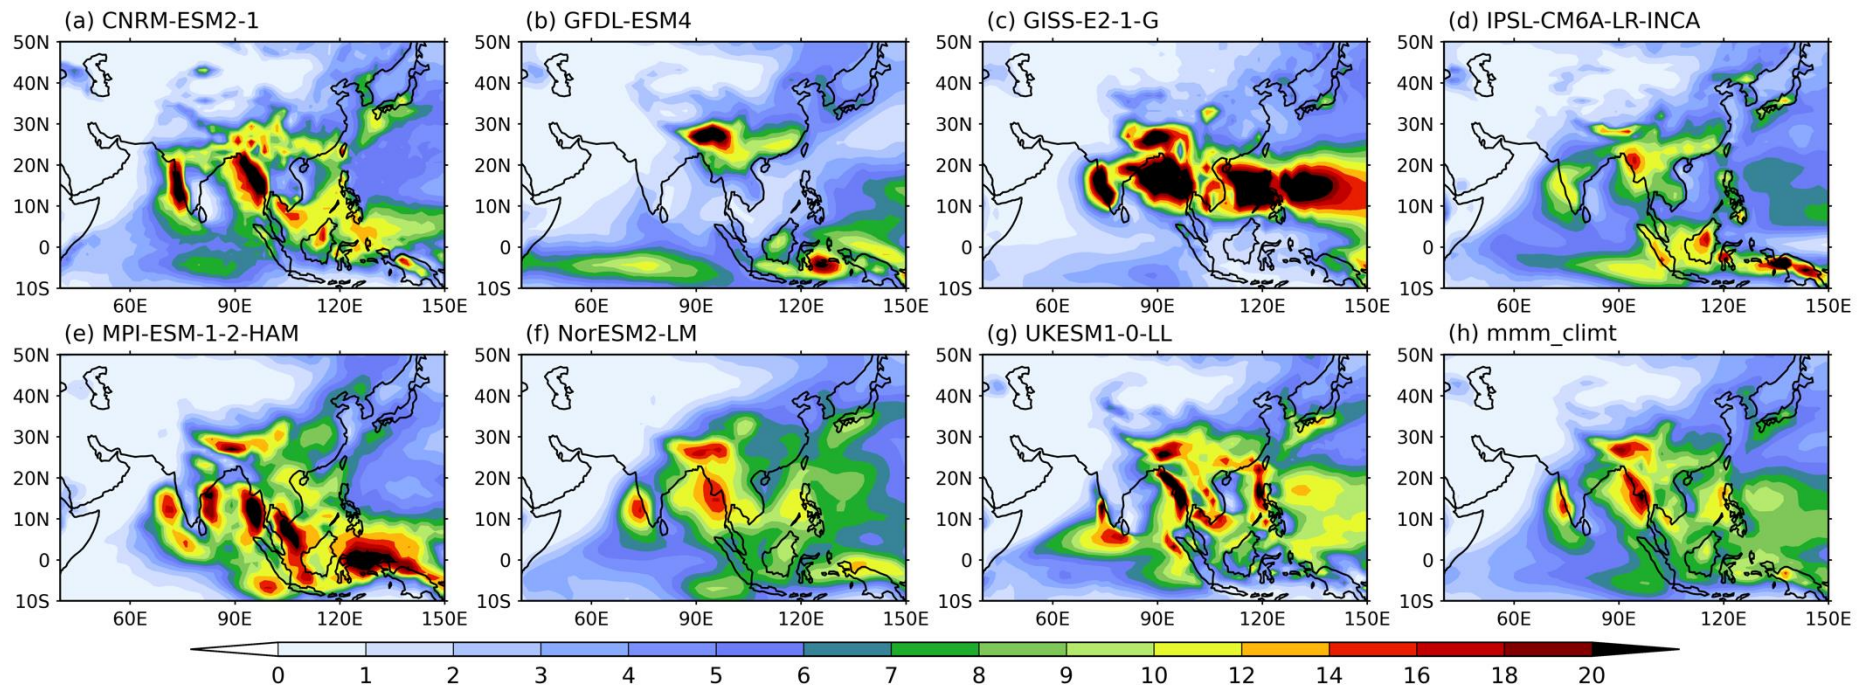

**Figure S2.** Model's simulated JJA climatology of precipitation (mm day<sup>-1</sup>) derived from the piClim-control.

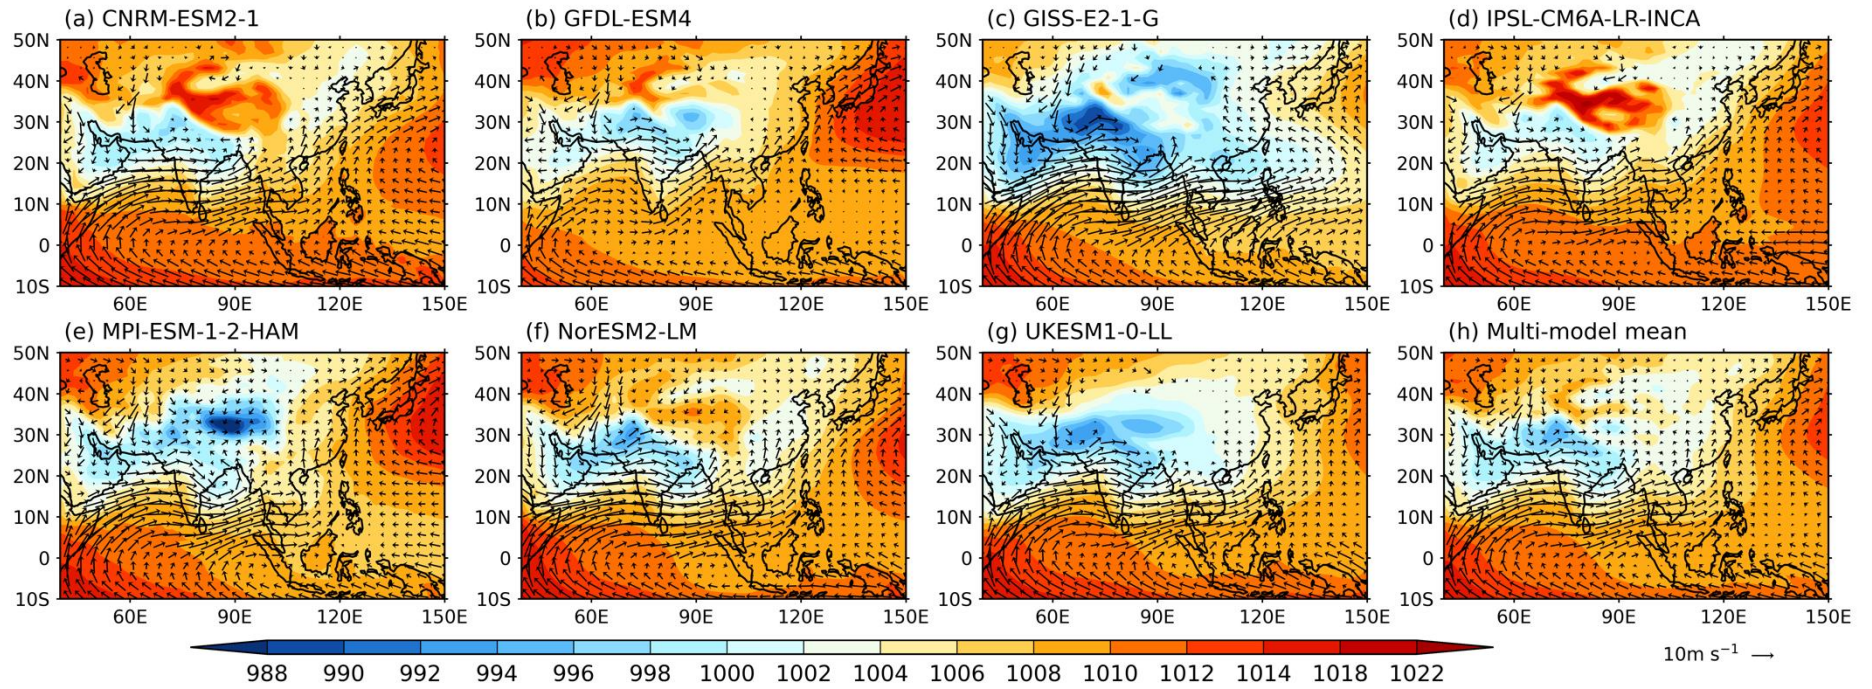

**Figure S3.** Model's simulated JJA climatology of sea level pressure (colours, hPa) and 850-hPa winds (vectors,  $\text{m s}^{-1}$ ) derived from the piClim-control.

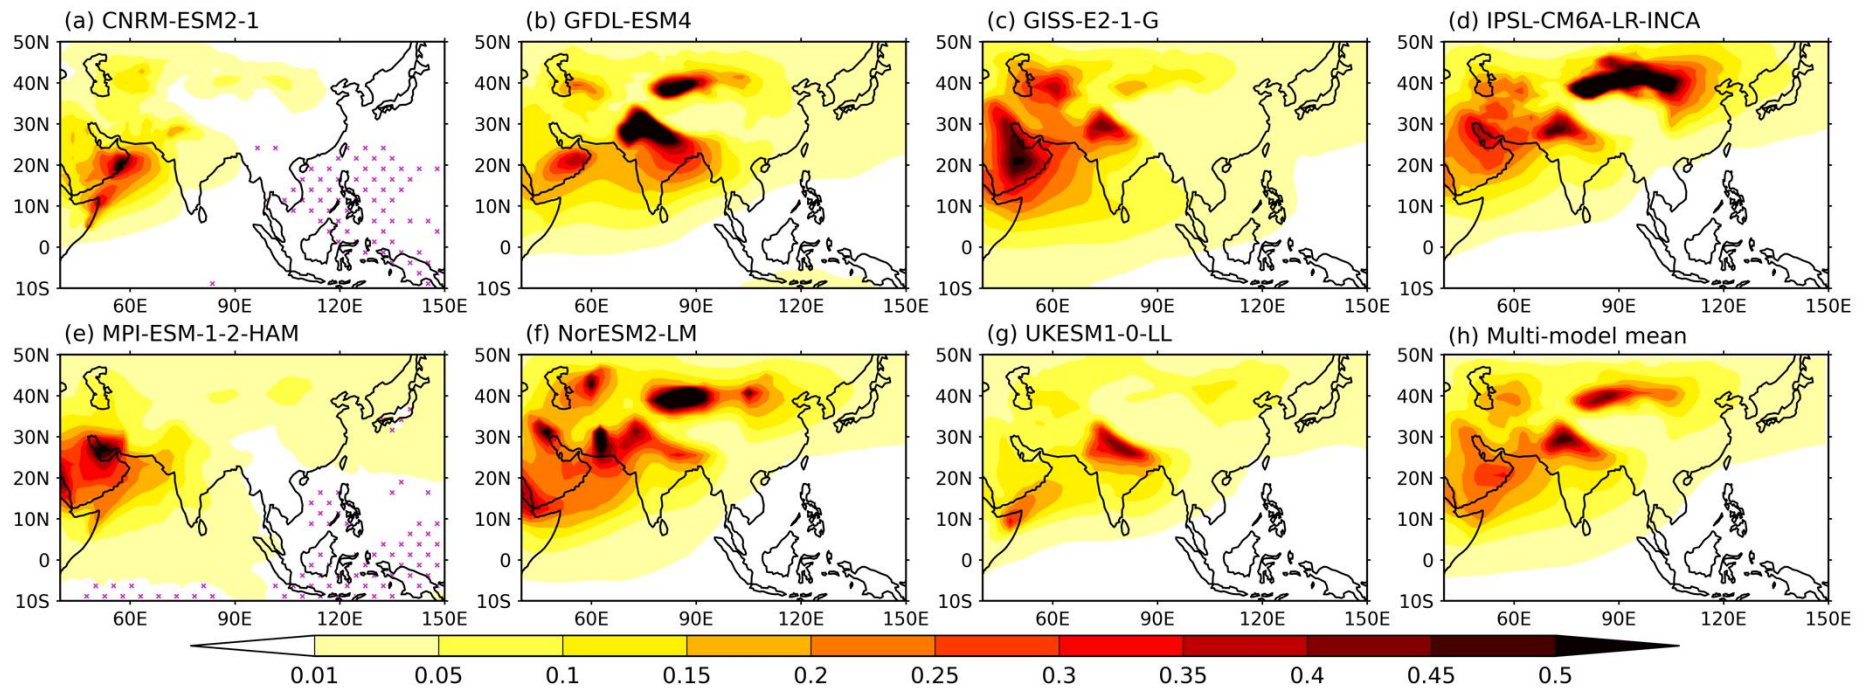

**Figure S4.** JJA mean changes in dust aerosol optical depth (DOD) due to doubled dust emissions in (a-g) individual models and (h) the multi-model mean. Purple hatches denote insignificant differences at the 10% level. Green hatches in (h) denote where  $\leq 4$  models have the same sign as the multi-model mean.

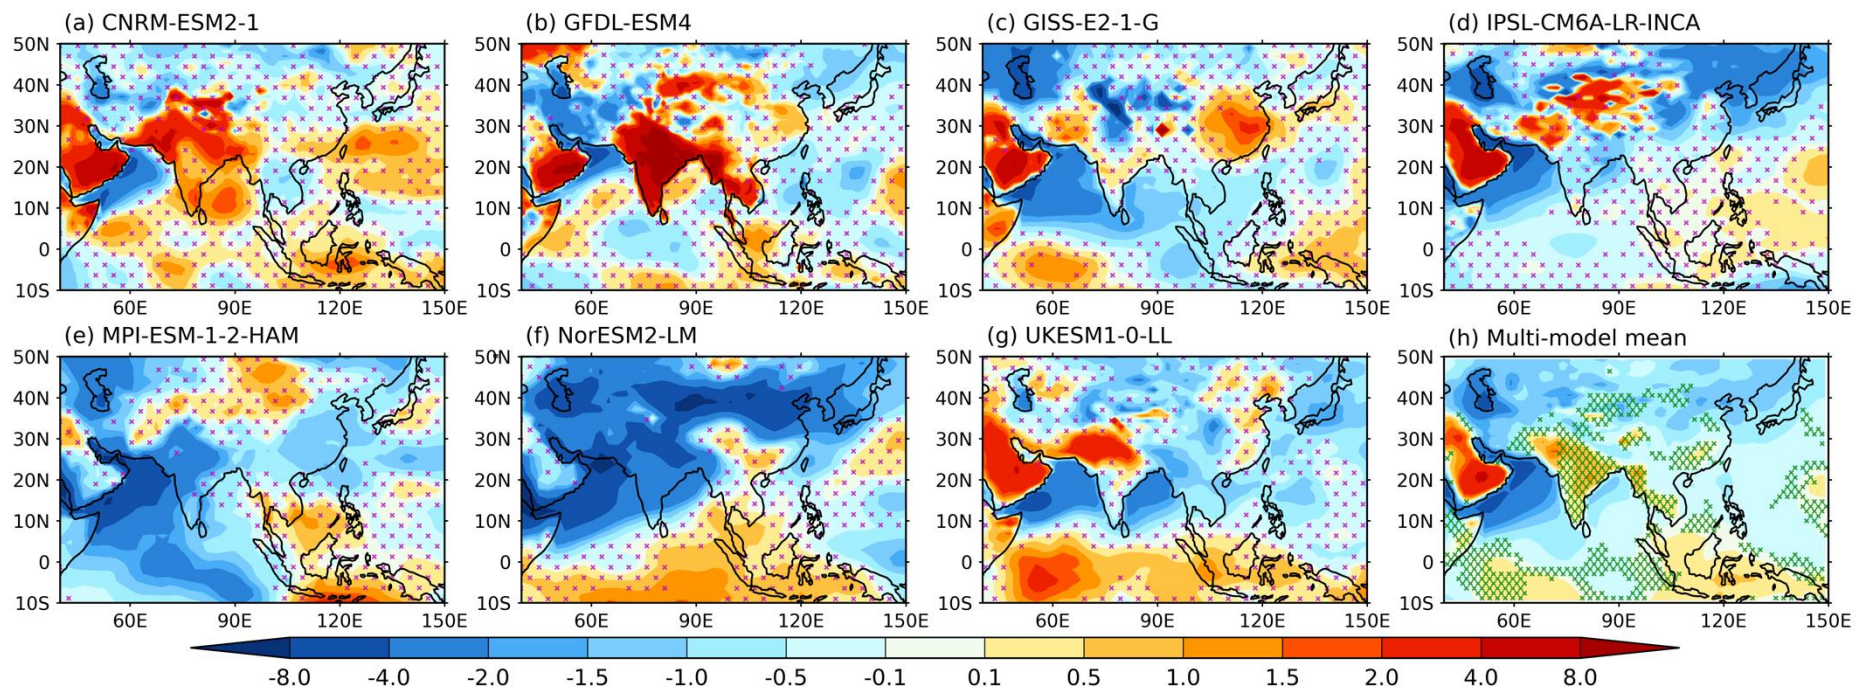

**Figure S5.** JJA mean changes in TOA clear-sky ERF ( $W m^{-2}$ ) due to doubled dust emissions in (a-g) individual models and (h) the multi-model mean. Purple hatches denote insignificant differences at the 10% level. Green hatches in (h) denote where  $\leq 4$  models have the same sign as the multi-model mean.

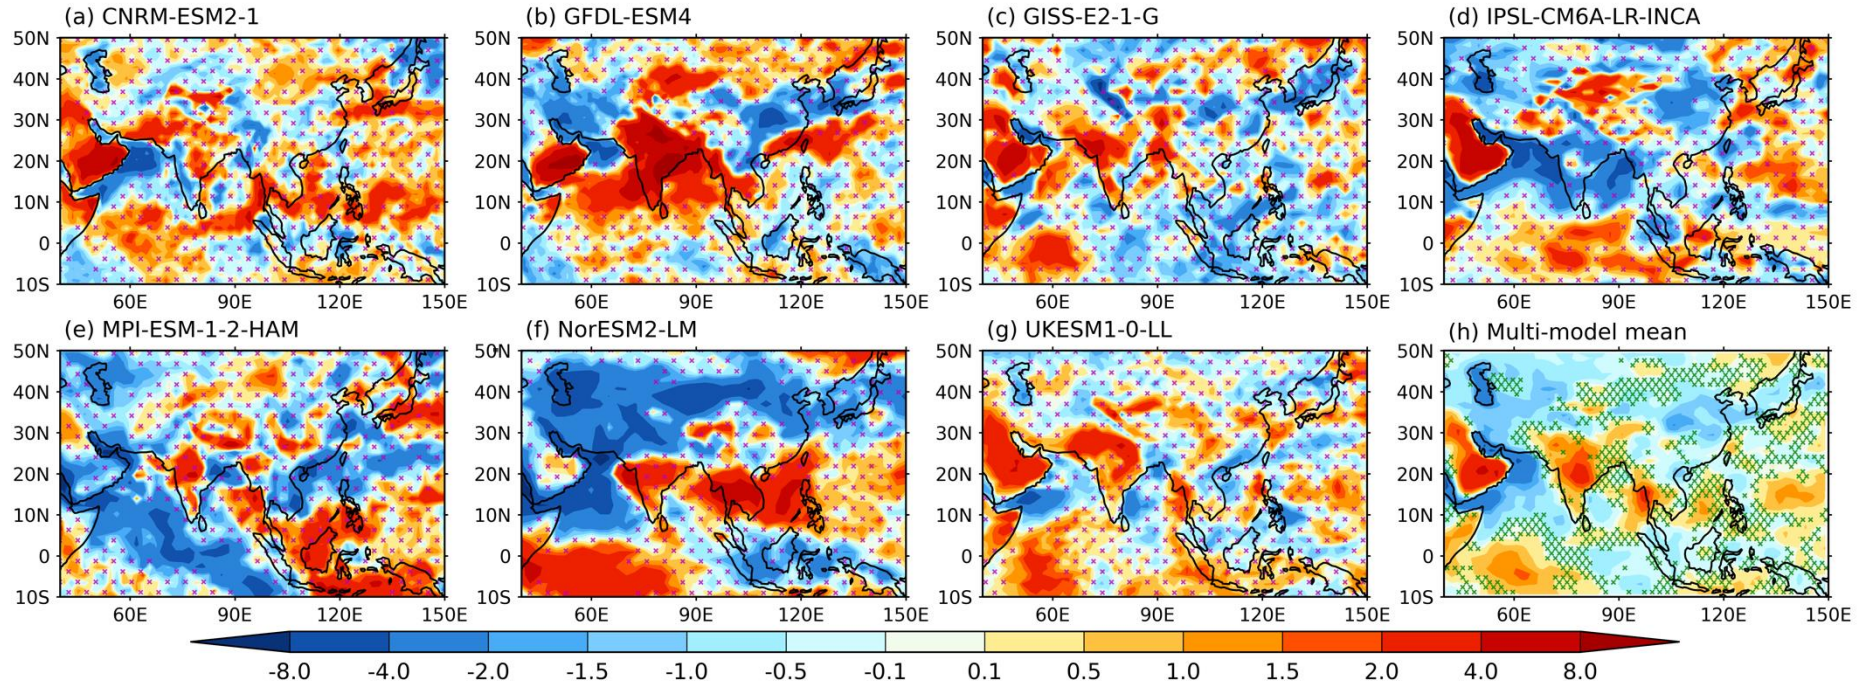

**Figure S6.** JJA mean changes in TOA all-sky net ERF ( $W m^{-2}$ ) due to doubled dust emissions in (a-g) individual models and (h) the multi-model mean. Purple hatches denote insignificant differences at the 10% level. Green hatches in (h) denote where  $\leq 4$  models have the same sign as the multi-model mean.

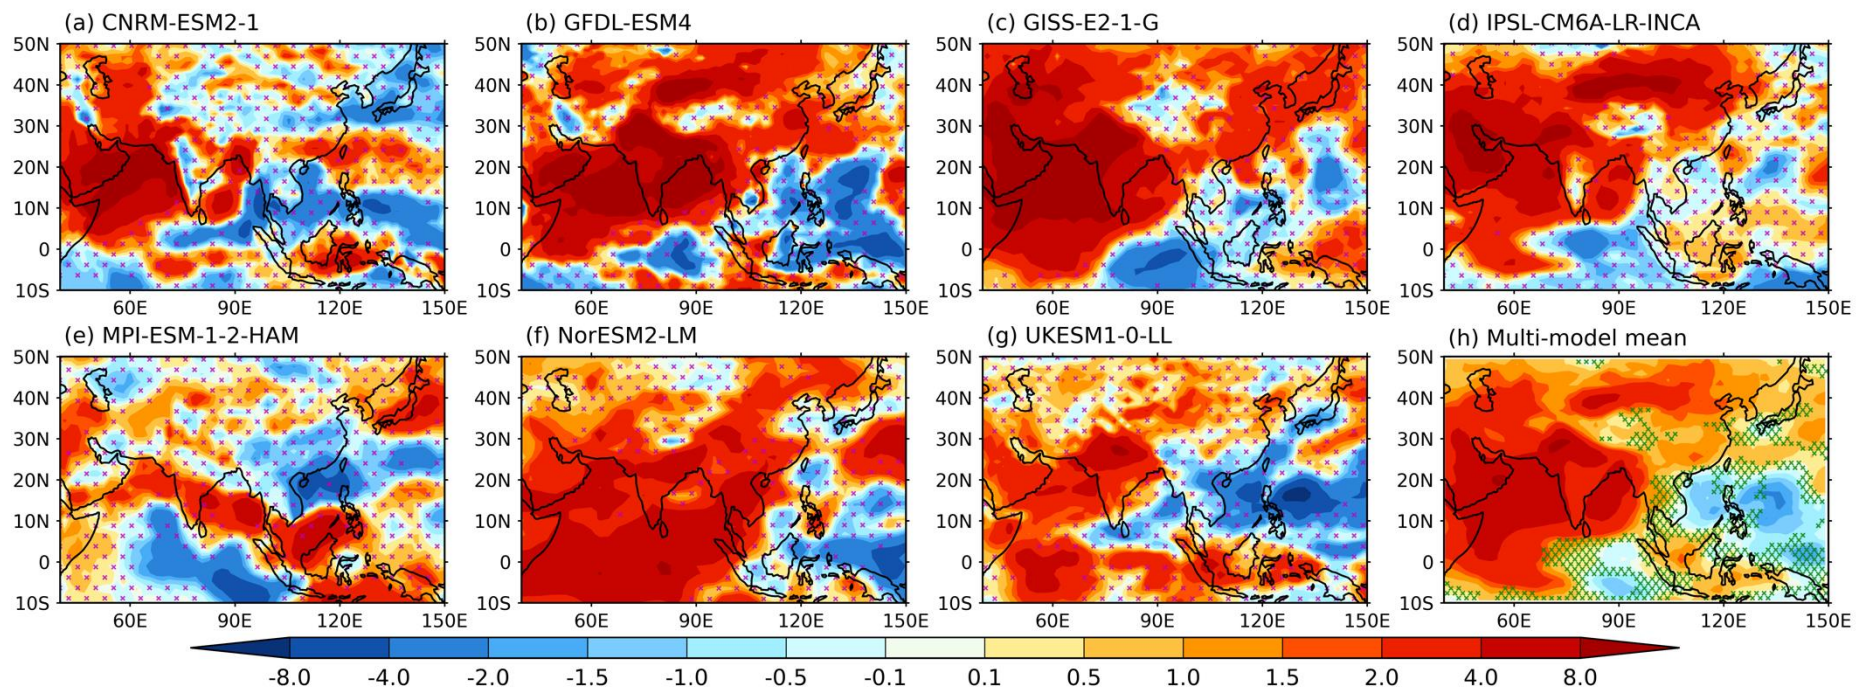

**Figure S7** JJA mean changes in atmospheric absorption ( $W m^{-2}$ ) due to doubled dust emissions in (a-g) individual models and (h) the multi-model mean. Purple hatches denote insignificant differences at the 10% level. Green hatches in (h) denote where  $\leq 4$  models have the same sign as the multi-model mean.



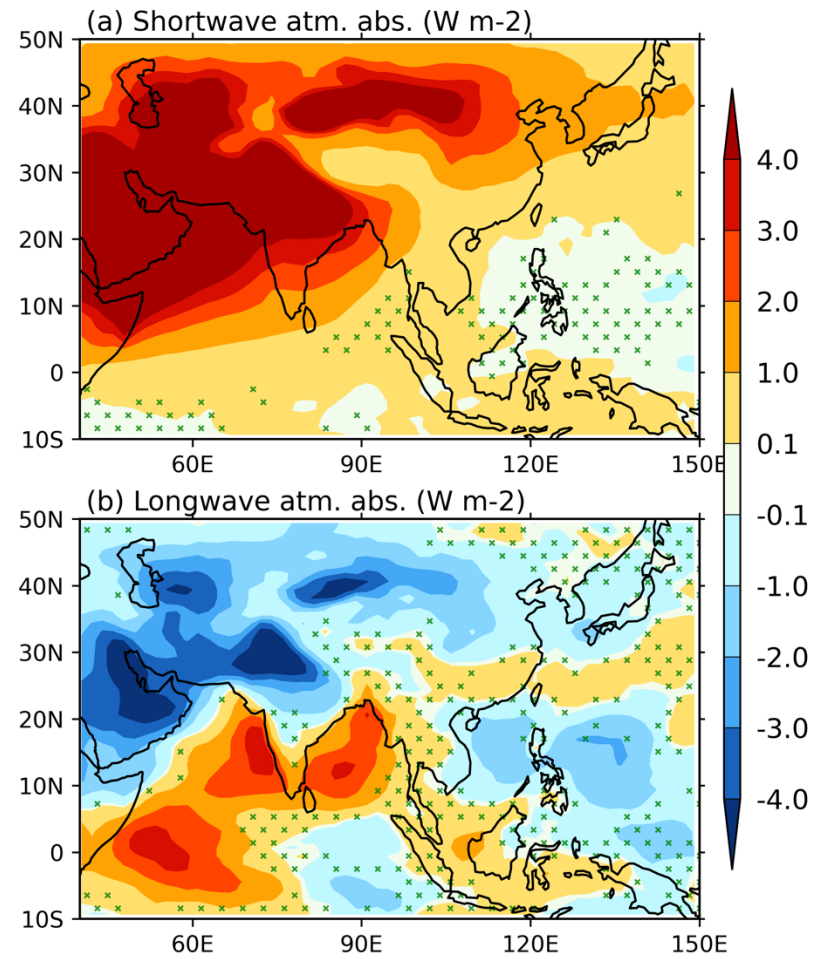

**Figure S8.** JJA multi-model mean changes in all-sky (a) shortwave and (b) longwave atmospheric absorption ( $W m^{-2}$ ) due to doubled dust emissions. Green hatches denote where  $\leq 4$  models have the same sign as the multi-model mean.

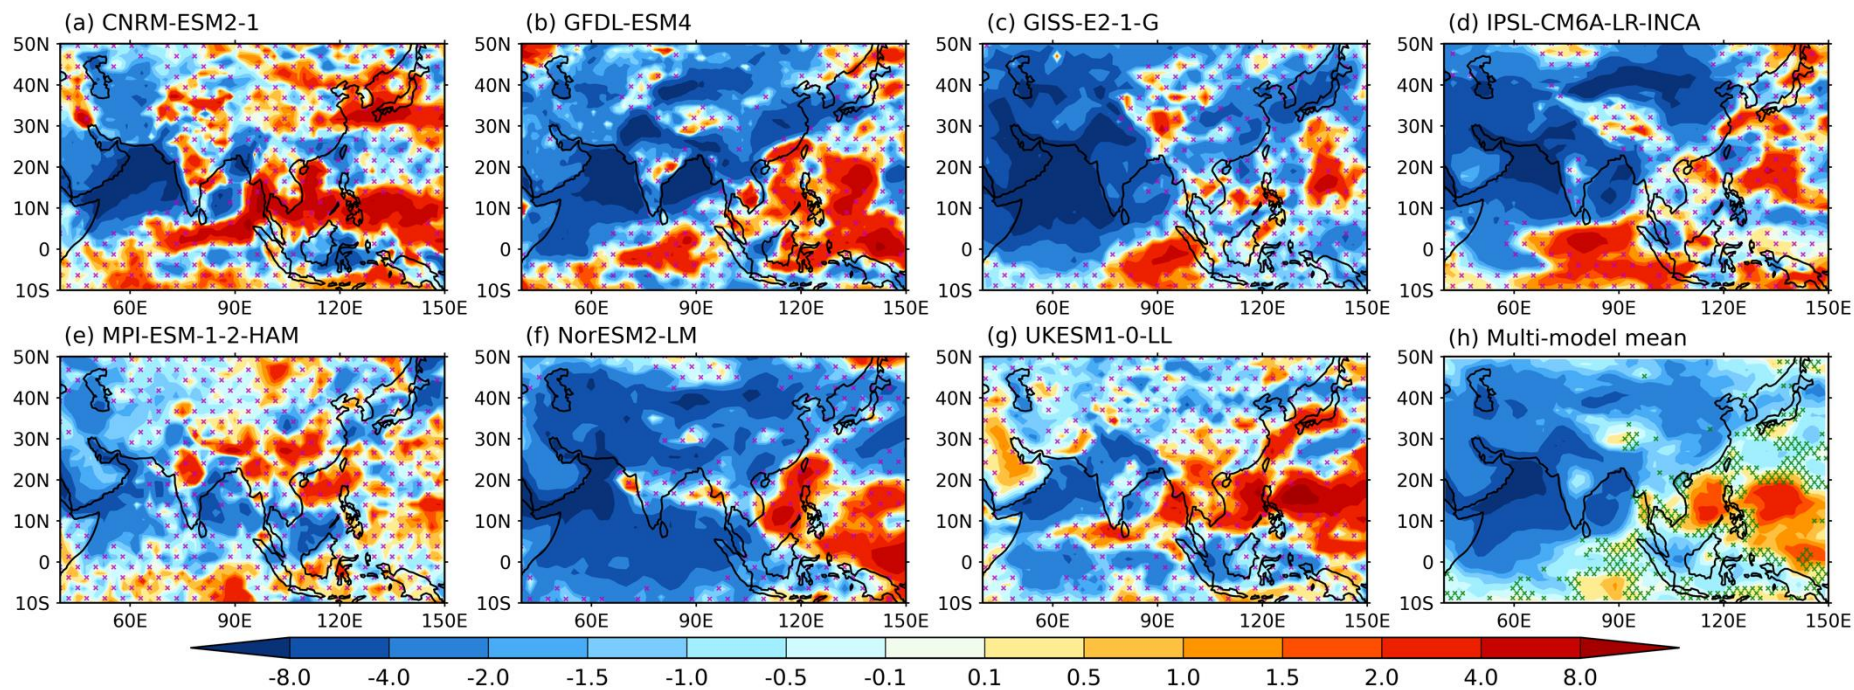

**Figure S9.** JJA mean changes in surface all-sky net ERF ( $W m^{-2}$ ) due to doubled dust emissions in (a-g) individual models and (h) the multi-model mean. Purple hatches denote insignificant differences at the 10% level. Green hatches in (h) denote where  $\leq 4$  models have the same sign as the multi-model mean.

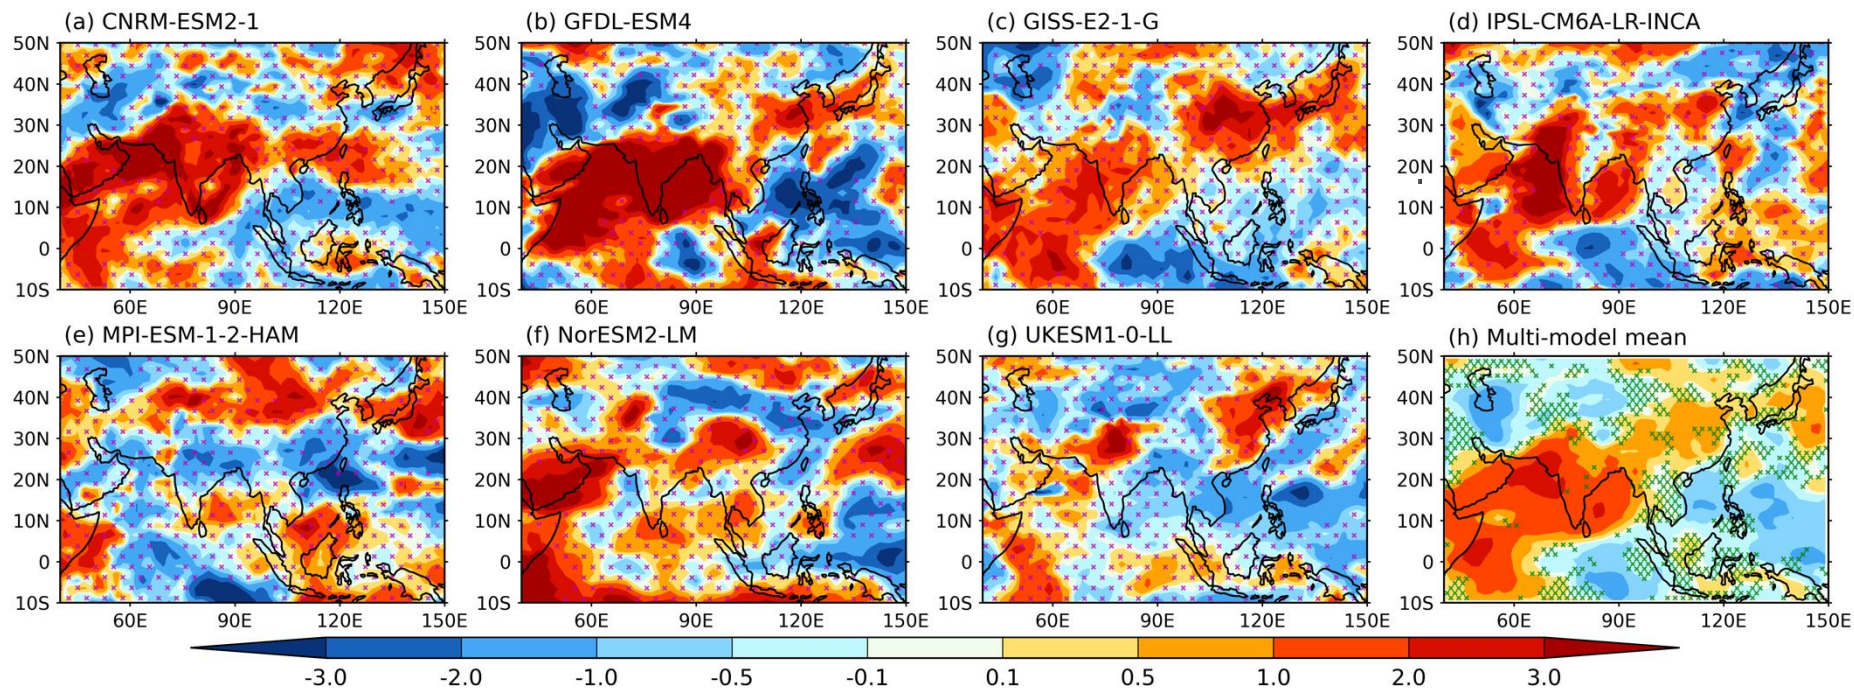

**Figure S10.** JJA mean changes in total cloud fraction (%) due to doubled dust emissions in (a-g) individual models and (h) the multi-model mean. Purple hatches denote insignificant differences at the 10% level. Green hatches in (h) denote where  $\leq 4$  models have the same sign as the multi-model mean.

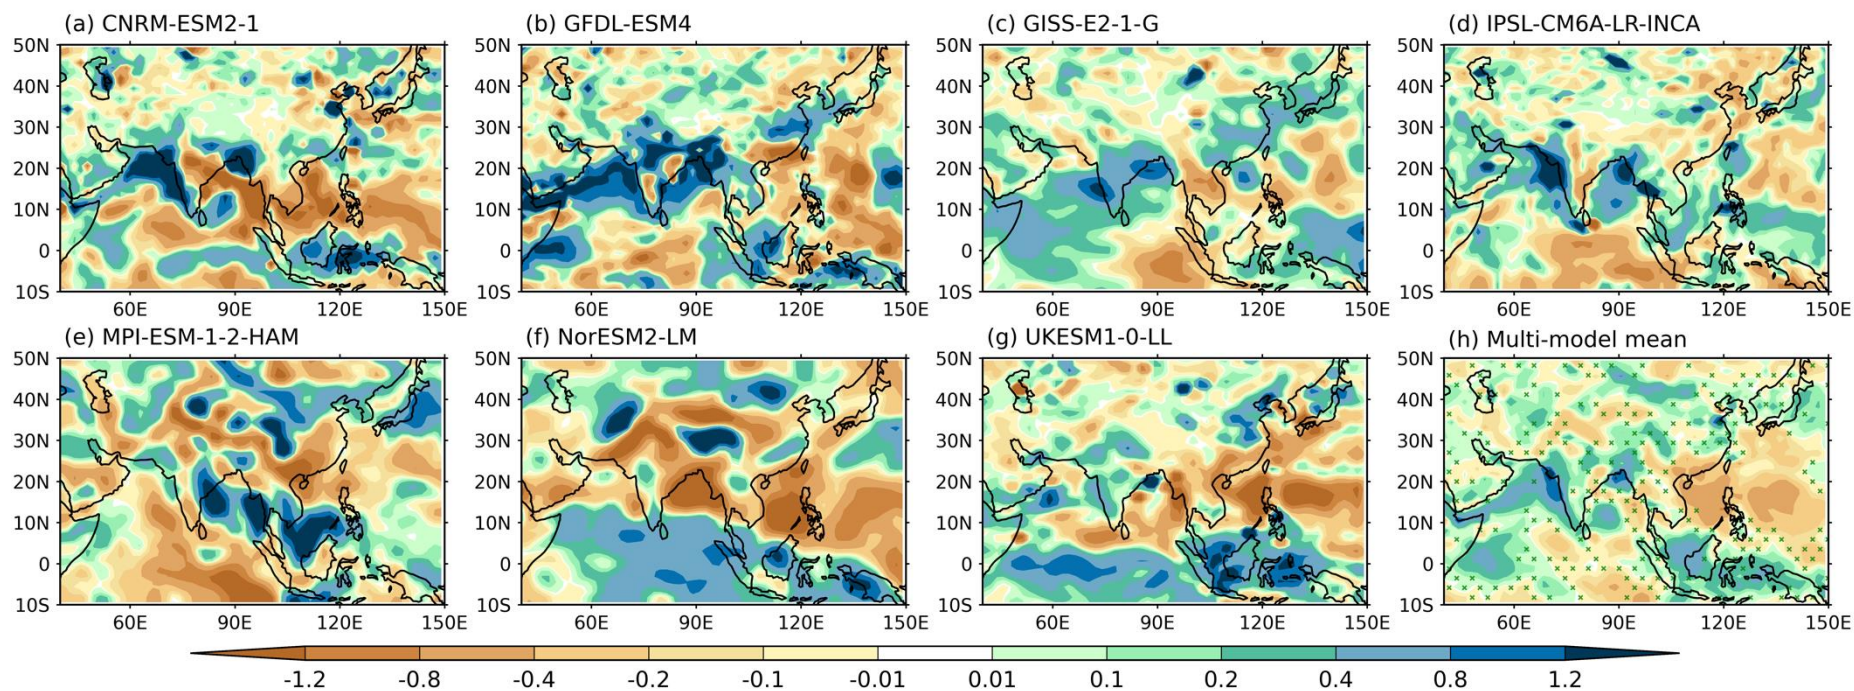

**Figure S11.** JJA mean changes in vertically integrated moisture flux convergence ( $\text{mm day}^{-1}$ ) due to doubled dust emissions in (a-g) individual models and (h) the multi-model mean. Green hatches in (h) denote where  $\leq 4$  models have the same sign as the multi-model mean.

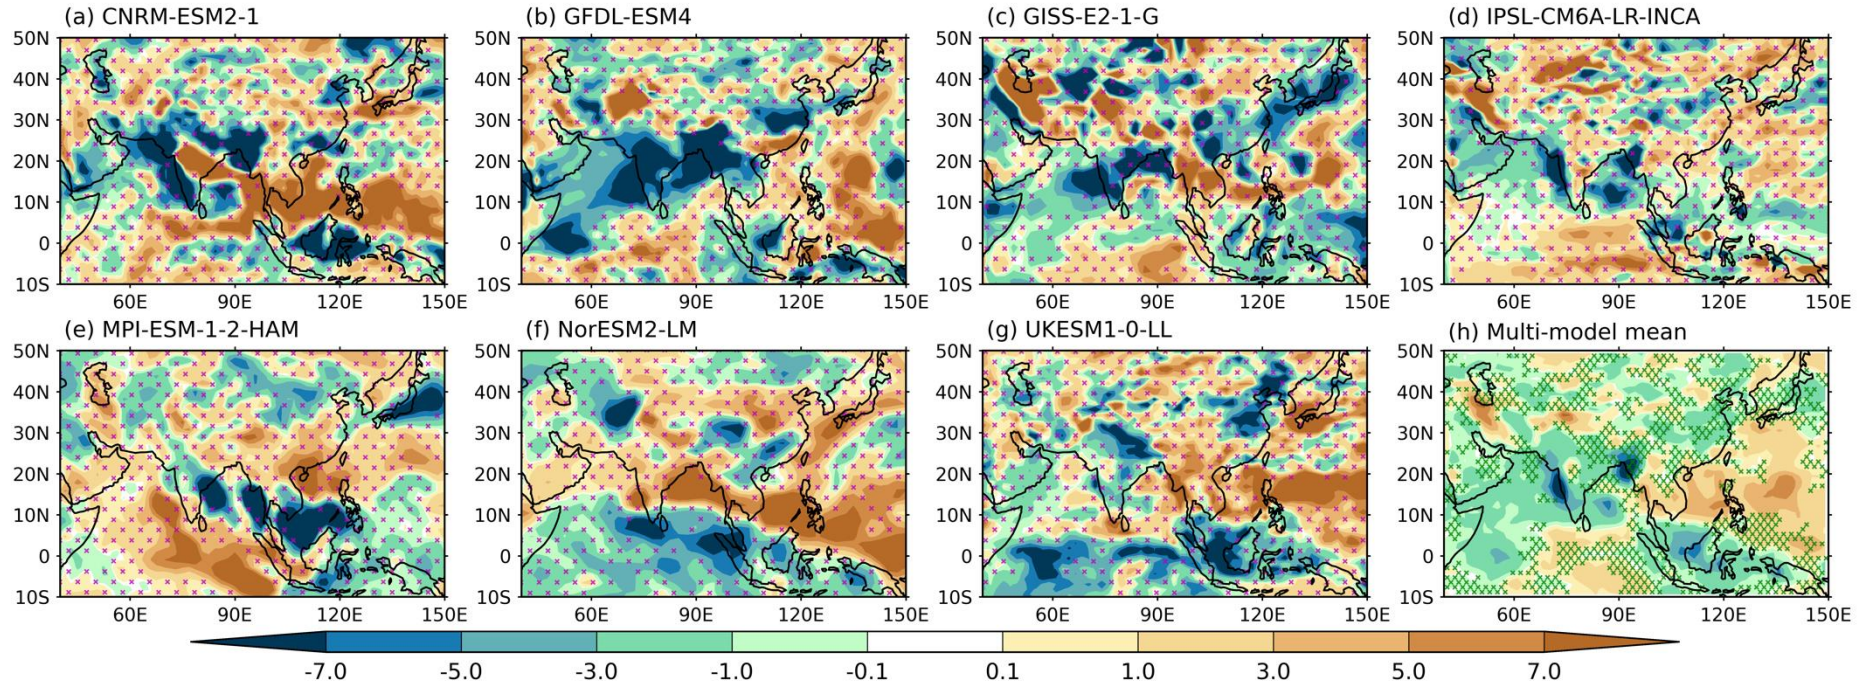

**Figure S12.** JJA mean changes in 500-hPa vertical velocity ( $\text{hPa day}^{-1}$ ) due to doubled dust emissions in (a-g) individual models and (h) the multi-model mean. Purple hatches denote insignificant differences at the 10% level. Green hatches in (h) denote where  $\leq 4$  models have the same sign as the multi-model mean.

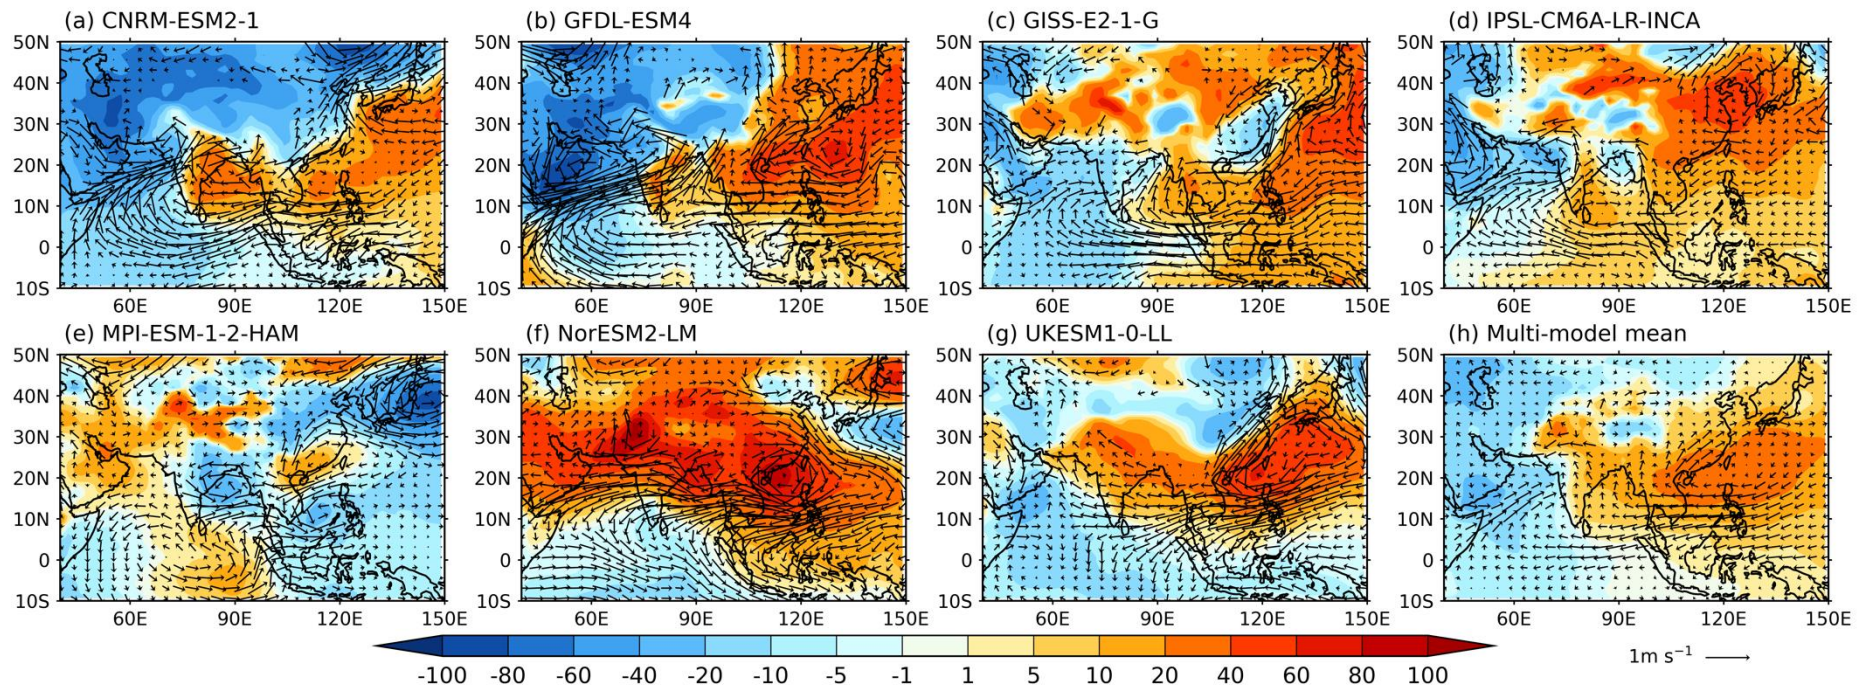

**Figure S13.** JJA mean changes in sea level pressure (colours, Pa) and in 850-hPa winds (vectors,  $\text{m s}^{-1}$ ) due to doubled dust emissions in (a-g) individual models and (h) the multi-model mean.
